# Supplementary material for: Use of Computed Tomography of the Head in Patients With Acute Atraumatic Altered Mental Status: A Systematic Review and Meta-analysis
Source: PubMed Central journal article supplement (PMC9675006; doi:10.1001/jamanetworkopen.2022.42805), 2022-11-18
Supplement: jamanetwopen-e2242805-s001.pdf [file jamanetwopen-e2242805-s001.pdf]

## Supplementary Online Content

Acharya R, Kafle S, Shrestha DB, et al. Use of computed tomography of the head in patients with acute atraumatic altered mental status: a systematic review and meta-analysis. *JAMA Netw Open.* 2022;5(11):e2242805. doi:10.1001/jamanetworkopen.2022.42805

**eTable 1.** Database Search Strategy

**eTable 2.** The Joanna Briggs Institute's (JBI) Critical Appraisal Checklist for Case-Control Study

**eTable 3.** The Joanna Briggs Institute's (JBI) Critical Appraisal Checklist for Cohort Study

**eTable 4.** The Joanna Briggs Institute's (JBI) Critical Appraisal Checklist for Quasi-Experimental Study

**eFigure 1.** The Proportion of Computed Tomography of the Head (CTH) in Patients With Altered Mental Status (AMS) Among Studies

**eFigure 2.** Funnel Plot Showing the Asymmetric Distribution of Studies Suggesting Significant Publication Bias for Computed Tomography of the Head (CTH) Events

**eFigure 3.** Funnel Plot Showing the Asymmetric Distribution of Studies Suggesting Significant Publication Bias for Positive Computed Tomography of the Head (CTH) Events

**eFigure 4.** Sensitivity Analysis of Studies for Computed Tomography of the Head (CTH) Events

**eFigure 5.** Sensitivity Analysis of Studies for Positive Computed Tomography of the Head (CTH) Events

This supplementary material has been provided by the authors to give readers additional information about their work.

**eTable 1. Database Search Strategy**

|                                                                                                                                                                                                                                                                                                                                                                                                                                                                                                                                                                                                                                                                                                                                                                                                                                                                                                                                                                                                                                                                                                                                                                                                                                                                                                                                                                                                           |
|-----------------------------------------------------------------------------------------------------------------------------------------------------------------------------------------------------------------------------------------------------------------------------------------------------------------------------------------------------------------------------------------------------------------------------------------------------------------------------------------------------------------------------------------------------------------------------------------------------------------------------------------------------------------------------------------------------------------------------------------------------------------------------------------------------------------------------------------------------------------------------------------------------------------------------------------------------------------------------------------------------------------------------------------------------------------------------------------------------------------------------------------------------------------------------------------------------------------------------------------------------------------------------------------------------------------------------------------------------------------------------------------------------------|
| <p><b>Building block approach to search database</b></p> <p>Altered mental status: "altered mental status"[tw] OR confusion[tw] OR disorientation OR unconscious*[tw] OR AMS[tw]<br/>CT head: "Tomography, X-ray Computed"[Mesh] OR "CT Head" OR CTH</p>                                                                                                                                                                                                                                                                                                                                                                                                                                                                                                                                                                                                                                                                                                                                                                                                                                                                                                                                                                                                                                                                                                                                                  |
| <p><b>PubMed/MEDLINE, PubMed Central</b><br/>("altered mental status"[tw] OR confusion[tw] OR disorientation OR unconscious*[tw] OR AMS[tw]) AND ("Tomography, X-Ray Computed"[Mesh] OR "CT Head"[tw] OR CTH[tw])</p> <p><b>PubMed/Medline: 2308 Hits</b><br/><a href="https://pubmed.ncbi.nlm.nih.gov/?term=%28%22altered+mental+status%22%5Btw%5D+OR+confusion%5Btw%5D+OR+disorientation+OR+unconscious*%5Btw%5D+OR+AMS%5Btw%5D%29+AND+%28%22Tomography%2C+X-Ray+Computed%22%5BMesh%5D+OR+%22CT+Head%22%5Btw%5D+OR+CTH%5Btw%5D%29&amp;size=200">https://pubmed.ncbi.nlm.nih.gov/?term=%28%22altered+mental+status%22%5Btw%5D+OR+confusion%5Btw%5D+OR+disorientation+OR+unconscious*%5Btw%5D+OR+AMS%5Btw%5D%29+AND+%28%22Tomography%2C+X-Ray+Computed%22%5BMesh%5D+OR+%22CT+Head%22%5Btw%5D+OR+CTH%5Btw%5D%29&amp;size=200</a></p> <p><b>PubMed Central: 4671 Hits</b><br/><a href="https://www.ncbi.nlm.nih.gov/pmc/?term=(%22altered+mental+status%22%5Btw%5D+OR+confusion%5Btw%5D+OR+disorientation+OR+unconscious*%5Btw%5D+OR+AMS%5Btw%5D)+AND+(%22Tomography%2C+X-Ray+Computed%22%5BMesh%5D+OR+%22CT+Head%22%5Btw%5D+OR+CTH%5Btw%5D)">https://www.ncbi.nlm.nih.gov/pmc/?term=(%22altered+mental+status%22%5Btw%5D+OR+confusion%5Btw%5D+OR+disorientation+OR+unconscious*%5Btw%5D+OR+AMS%5Btw%5D)+AND+(%22Tomography%2C+X-Ray+Computed%22%5BMesh%5D+OR+%22CT+Head%22%5Btw%5D+OR+CTH%5Btw%5D)</a></p> |
| <p><b>CINAHL: 628 Hits</b><br/>("altered mental status" OR confusion OR delirium OR disorientation OR unconscious OR AMS) AND ("Tomography, X-Ray Computed" OR "CT Head" OR CTH)</p> <p><a href="https://web-p-ebSCOhost-com.proxy.campbell.edu/ehost/results?vid=1&amp;sid=315f5b5a-d468-4b0d-9b3c-ca1abed29ccb%40redis&amp;bquery=(%22altered+mental+status%22+OR+confusion+OR+delirium+OR+disorientation+OR+unconscious+OR+AMS)+AND+(%22Tomography%2c+X-Ray+Computed%22+OR+%22CT+Head%22+OR+CTH)&amp;bdata=JmRiPWNjbSZ0eXBIPTAmc2VhcmNoTW9kZT1TdGFuZGFyZCZzaXRIPWVob3N0LWxpdmU%3d">https://web-p-ebSCOhost-com.proxy.campbell.edu/ehost/results?vid=1&amp;sid=315f5b5a-d468-4b0d-9b3c-ca1abed29ccb%40redis&amp;bquery=(%22altered+mental+status%22+OR+confusion+OR+delirium+OR+disorientation+OR+unconscious+OR+AMS)+AND+(%22Tomography%2c+X-Ray+Computed%22+OR+%22CT+Head%22+OR+CTH)&amp;bdata=JmRiPWNjbSZ0eXBIPTAmc2VhcmNoTW9kZT1TdGFuZGFyZCZzaXRIPWVob3N0LWxpdmU%3d</a></p>                                                                                                                                                                                                                                                                                                                                                                                                                         |
| <p><b>EMBASE: 1731 hits</b><br/>('altered mental status'/exp OR 'altered mental status' OR 'confusion'/exp OR confusion OR 'delirium'/exp OR delirium OR 'disorientation'/exp OR disorientation OR 'unconscious'/exp OR unconscious OR ams) AND ('tomography, x-ray computed'/exp OR 'tomography, x-ray computed' OR 'ct head' OR cth)</p> <p><a href="https://www.embase.com/?phase=continueToApp#advancedSearch/resultspage/history.1/page.1/25.items/orderby.date/source">https://www.embase.com/?phase=continueToApp#advancedSearch/resultspage/history.1/page.1/25.items/orderby.date/source</a>.</p>                                                                                                                                                                                                                                                                                                                                                                                                                                                                                                                                                                                                                                                                                                                                                                                                |

**eTable 2.** The Joanna Briggs Institute’s (JBI) critical appraisal checklist for case-control study. Total quality scores  $\leq 4$ , 5 to 7, and  $\geq 8$  were considered as low, moderate and high quality respectively

| Study                       | Were the groups comparable other than the presence of disease in cases or the absence of disease in controls? | Were cases and controls matched appropriately? | Were the same criteria used for identification of cases and controls? | Was exposure measured in a standard, valid and reliable way? | Was exposure measured in the same way for cases and controls? | Were confounding factors identified? | Were strategies to deal with confounding factors stated? | Were outcomes assessed in a standard, valid and reliable way for cases and controls? | Was the exposure period of interest long enough to be meaningful? | Was appropriate statistical analysis used? | Score | Quality  |
|-----------------------------|---------------------------------------------------------------------------------------------------------------|------------------------------------------------|-----------------------------------------------------------------------|--------------------------------------------------------------|---------------------------------------------------------------|--------------------------------------|----------------------------------------------------------|--------------------------------------------------------------------------------------|-------------------------------------------------------------------|--------------------------------------------|-------|----------|
| Callen A et al. (2020)      | yes                                                                                                           | n/a                                            | yes                                                                   | yes                                                          | yes                                                           | n/a                                  | n/a                                                      | yes                                                                                  | yes                                                               | yes                                        | 7     | moderate |
| Chen H et al. (2020)        | yes                                                                                                           | Yes                                            | yes                                                                   | yes                                                          | yes                                                           | yes                                  | yes                                                      | yes                                                                                  | yes                                                               | yes                                        | 10    | high     |
| Detweiler M et al. (2020)   | yes                                                                                                           | Yes                                            | yes                                                                   | yes                                                          | yes                                                           | yes                                  | no                                                       | yes                                                                                  | yes                                                               | yes                                        | 9     | high     |
| Detweiler M et al. (2017)   | yes                                                                                                           | Yes                                            | yes                                                                   | yes                                                          | yes                                                           | yes                                  | no                                                       | yes                                                                                  | yes                                                               | yes                                        | 9     | high     |
| Finkelmeier F et al. (2019) | no                                                                                                            | n/a                                            | yes                                                                   | yes                                                          | yes                                                           | unclear                              | yes                                                      | yes                                                                                  | yes                                                               | yes                                        | 7     | moderate |
| Lai M et al. (2010)         | yes                                                                                                           | No                                             | yes                                                                   | yes                                                          | yes                                                           | yes                                  | yes                                                      | yes                                                                                  | yes                                                               | yes                                        | 9     | high     |
| Patel M et al. (2012)       | yes                                                                                                           | Yes                                            | yes                                                                   | yes                                                          | yes                                                           | unclear                              | yes                                                      | yes                                                                                  | yes                                                               | yes                                        | 8     | high     |
| Rahimi R et al. (2016)      | yes                                                                                                           | Yes                                            | yes                                                                   | yes                                                          | yes                                                           | unclear                              | yes                                                      | yes                                                                                  | yes                                                               | yes                                        | 9     | high     |
| Segard J et al. (2013)      | no                                                                                                            | Yes                                            | yes                                                                   | yes                                                          | yes                                                           | unclear                              | yes                                                      | yes                                                                                  | yes                                                               | yes                                        | 8     | high     |

**eTable 3.** The Joanna Briggs Institute’s (JBI) critical appraisal checklist for cohort study. Total quality scores  $\leq 4$ , 5 to 7, and  $\geq 8$  were considered as low, moderate and high quality respectively.

| Study                      | Were the two groups similar and recruited from the same population? | Were the exposures measured similarly to assign people to both exposed and unexposed groups? | Was the exposure measured in a valid and reliable way? | Were confounding factors identified? | Were strategies to deal with confounding factors stated? | Were the groups /participants free of the outcome at the start of the study (or at the moment of exposure)? | Were the outcomes measured in a valid and reliable way? | Was the follow up time reported and sufficient to be long enough for outcomes to occur? | Was follow up complete, and if not, were the reasons to loss to follow up described and explored? | Were strategies to address incomplete follow up utilized? | Was appropriate statistical analysis used? | Score | Quality  |
|----------------------------|---------------------------------------------------------------------|----------------------------------------------------------------------------------------------|--------------------------------------------------------|--------------------------------------|----------------------------------------------------------|-------------------------------------------------------------------------------------------------------------|---------------------------------------------------------|-----------------------------------------------------------------------------------------|---------------------------------------------------------------------------------------------------|-----------------------------------------------------------|--------------------------------------------|-------|----------|
| Bent C et al. (2015)       | n/a                                                                 | n/a                                                                                          | yes                                                    | yes                                  | no                                                       | yes                                                                                                         | yes                                                     | yes                                                                                     | yes                                                                                               | n/a                                                       | yes                                        | 7     | moderate |
| Chokshi F et al. (2016)    | n/a                                                                 | n/a                                                                                          | yes                                                    | no                                   | n/a                                                      | yes                                                                                                         | yes                                                     | yes                                                                                     | yes                                                                                               | n/a                                                       | yes                                        | 6     | moderate |
| Donovan L et al. (2015)    | yes                                                                 | n/a                                                                                          | yes                                                    | no                                   | n/a                                                      | yes                                                                                                         | yes                                                     | yes                                                                                     | yes                                                                                               | n/a                                                       | yes                                        | 7     | moderate |
| Hanna A et al (2021)       | n/a                                                                 | n/a                                                                                          | yes                                                    | yes                                  | yes                                                      | yes                                                                                                         | yes                                                     | yes                                                                                     | yes                                                                                               | n/a                                                       | yes                                        | 7     | moderate |
| Hufschmidt A et al. (2008) | yes                                                                 | yes                                                                                          | yes                                                    | unclear                              | unclear                                                  | yes                                                                                                         | yes                                                     | yes                                                                                     | yes                                                                                               | n/a                                                       | yes                                        | 8     | high     |
| Khan S et al. (2014)       | yes                                                                 | yes                                                                                          | yes                                                    | yes                                  | yes                                                      | yes                                                                                                         | yes                                                     | yes                                                                                     | yes                                                                                               | n/a                                                       | yes                                        | 10    | high     |
| Lim BL et al. (2009)       | yes                                                                 | yes                                                                                          | yes                                                    | unclear                              | unclear                                                  | yes                                                                                                         | yes                                                     | yes                                                                                     | yes                                                                                               | n/a                                                       | yes                                        | 8     | high     |
| Nesselroth D et al. (2021) | n/a                                                                 | n/a                                                                                          | yes                                                    | n/a                                  | n/a                                                      | yes                                                                                                         | yes                                                     | yes                                                                                     | yes                                                                                               | n/a                                                       | yes                                        | 6     | moderate |
| Patel R et al. (2019)      | n/a                                                                 | n/a                                                                                          | yes                                                    | n/a                                  | n/a                                                      | yes                                                                                                         | yes                                                     | yes                                                                                     | yes                                                                                               | n/a                                                       | yes                                        | 6     | moderate |
| Shuaib W et al (2014)      | n/a                                                                 | n/a                                                                                          | yes                                                    | n/a                                  | n/a                                                      | yes                                                                                                         | yes                                                     | yes                                                                                     | yes                                                                                               | n/a                                                       | yes                                        | 6     | moderate |

|                                |     |     |     |         |         |     |     |     |     |     |     |   |          |
|--------------------------------|-----|-----|-----|---------|---------|-----|-----|-----|-----|-----|-----|---|----------|
| Sinclair D et al. (1993)       | n/a | n/a | yes | n/a     | n/a     | yes | yes | yes | yes | n/a | yes | 6 | moderate |
| Thacker P et al. (2021)        | n/a | n/a | yes | n/a     | n/a     | yes | yes | yes | yes | n/a | yes | 6 | moderate |
| Theisen-Toupal J et al. (2014) | n/a | n/a | yes | unclear | unclear | yes | yes | yes | yes | n/a | yes | 6 | moderate |
| Tu L et al (2021)              | n/a | n/a | yes | n/a     | n/a     | yes | yes | yes | yes | n/a | yes | 5 | moderate |
| Wang X et al. (2013)           | yes | yes | yes | unclear | yes     | yes | yes | yes | yes | n/a | yes | 9 | high     |
| Wong J et al. (2014)           | yes | yes | yes | no      | n/a     | yes | yes | yes | yes | n/a | yes | 8 | moderate |

**eTable 4.** The Joanna Briggs Institute’s (JBI) critical appraisal checklist for quasi-experimental study. Total quality scores  $\leq 4$ , 5 to 7 and  $\geq 8$  were regarded as low, moderate, and high quality, respectively.

| Study                   | Is it clear in the study what is the ‘cause’ and what is the ‘effect’ (i.e. there is no confusion about which variable comes first)? | Were the participants included in any comparisons similar? | Were the participants included in any comparisons receiving similar treatment/care, other than the exposure or intervention of interest? | Was there a control group? | Were there multiple measurements of the outcome both pre and post the intervention/exposure? | Was follow up complete and if not, were differences between groups in terms of their follow up adequately described and analyzed? | Were the outcomes of participants included in any comparisons measured in the same way? | Were outcomes measured in a reliable way? | Was appropriate statistical analysis used? | Score | Quality  |
|-------------------------|--------------------------------------------------------------------------------------------------------------------------------------|------------------------------------------------------------|------------------------------------------------------------------------------------------------------------------------------------------|----------------------------|----------------------------------------------------------------------------------------------|-----------------------------------------------------------------------------------------------------------------------------------|-----------------------------------------------------------------------------------------|-------------------------------------------|--------------------------------------------|-------|----------|
| Covin o M eta l. (2019) | yes                                                                                                                                  | yes                                                        | n/a                                                                                                                                      | n/a                        | yes                                                                                          | Yes                                                                                                                               | yes                                                                                     | yes                                       | yes                                        | 7     | moderate |

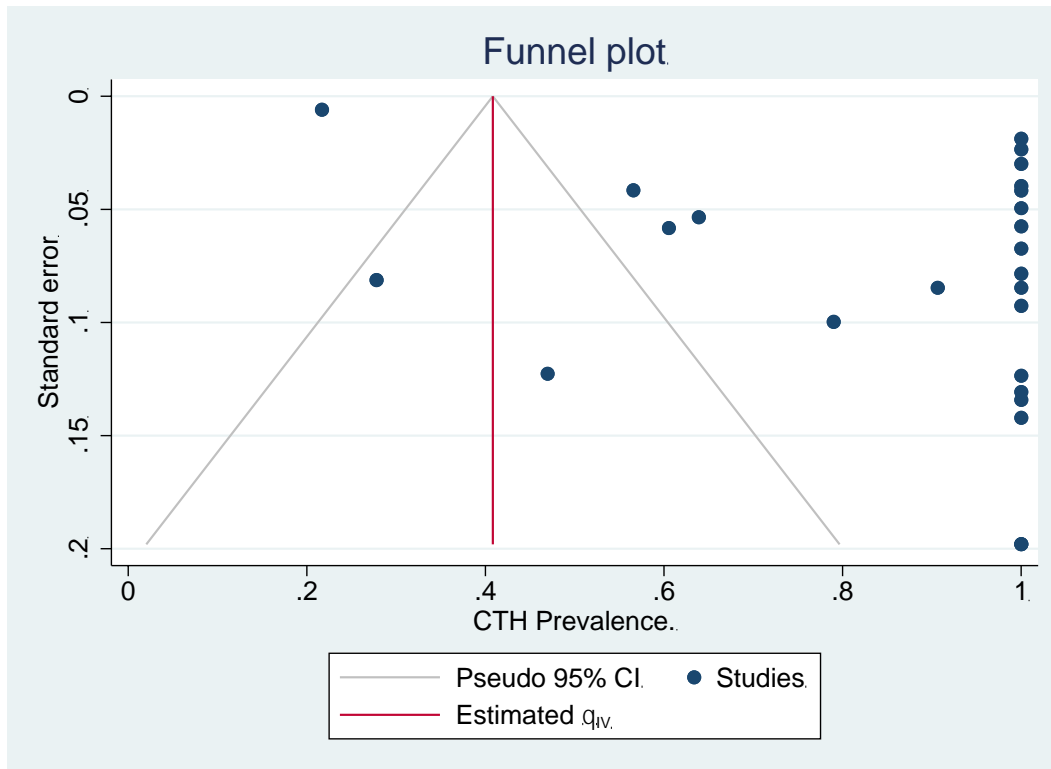

**Figure 1.** Funnel Plot Showing the Asymmetric Distribution of Studies Suggesting Significant Publication Bias for Computerized Tomography of Head (CTH) Events

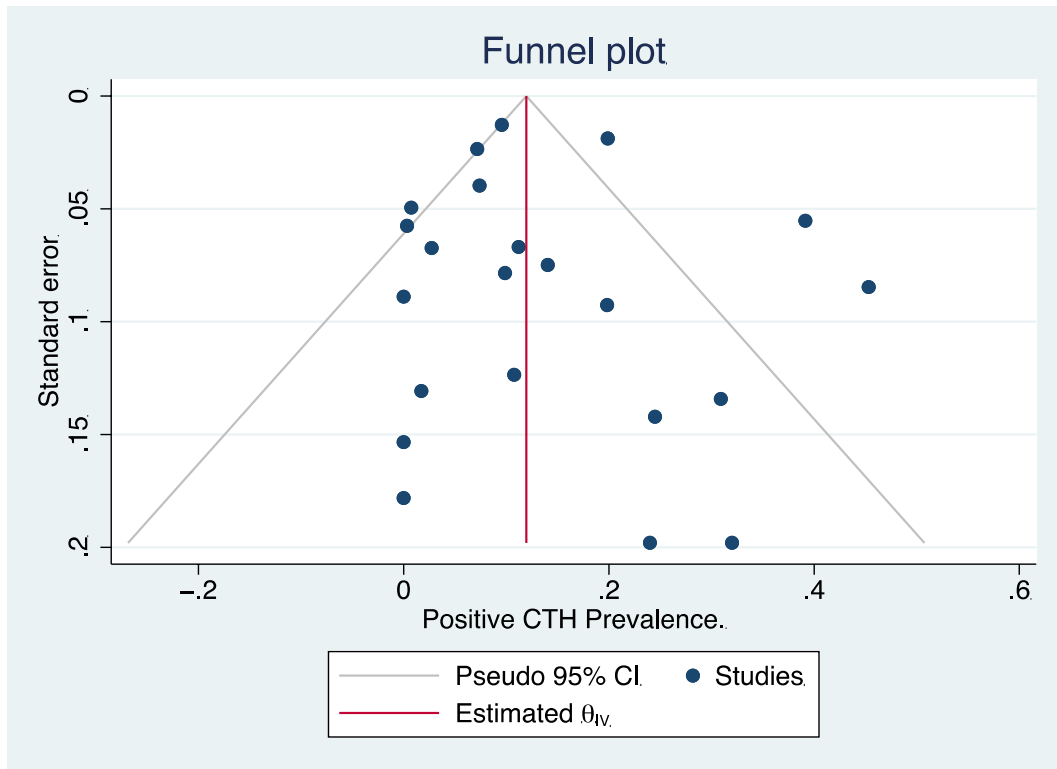

**eFigure 2.** Funnel Plot Showing the Asymmetric Distribution of Studies Suggesting Significant Publication Bias for Positive Computerized Tomography of Head (CTH) Events



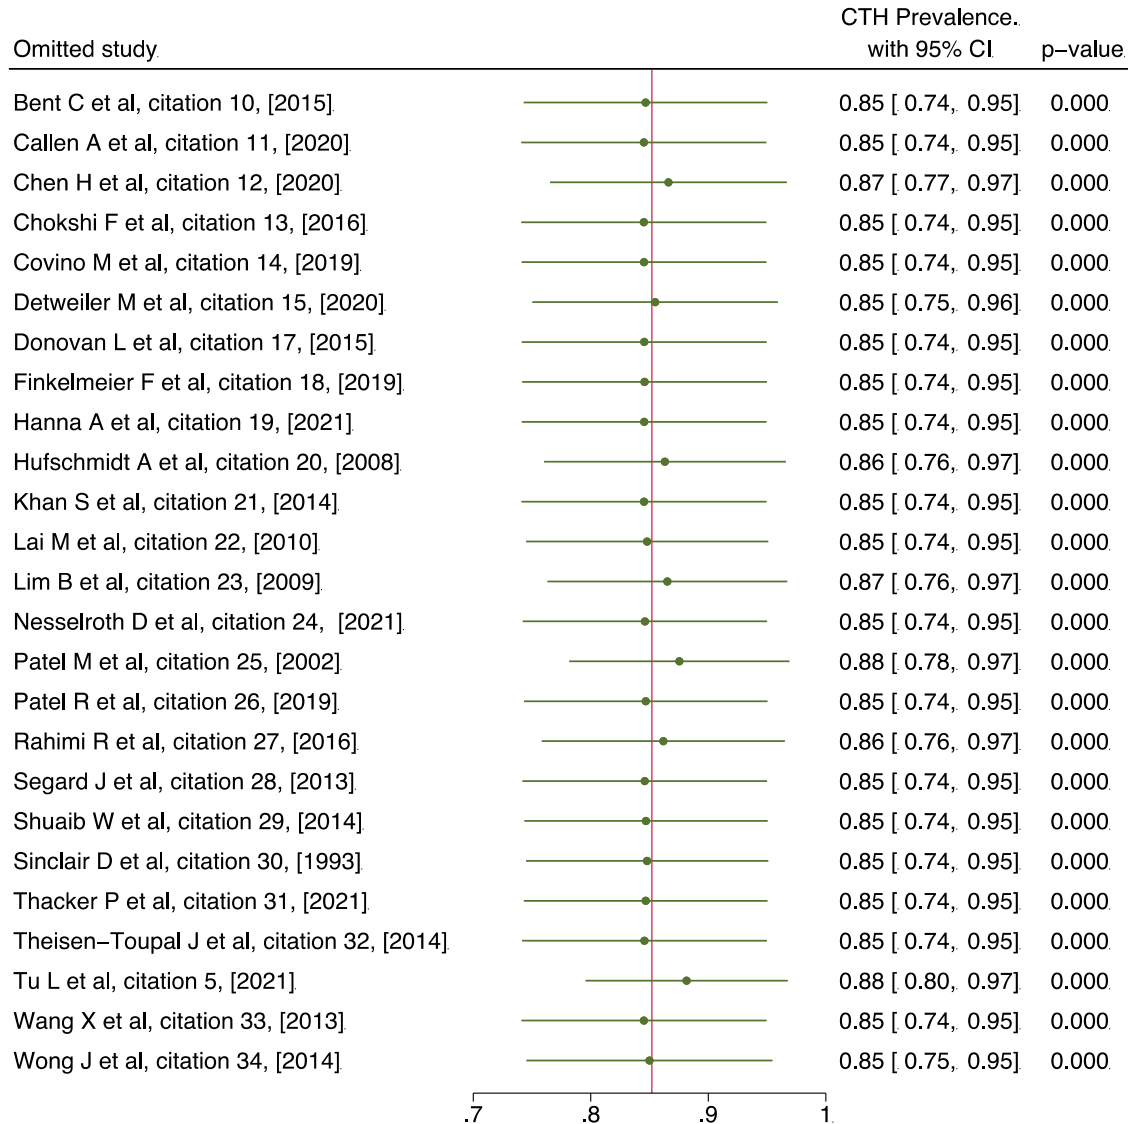

Random-effects REML model

**eFigure 3.** Sensitivity Analysis of Studies for Computerized Tomography of Head (CTH) Event

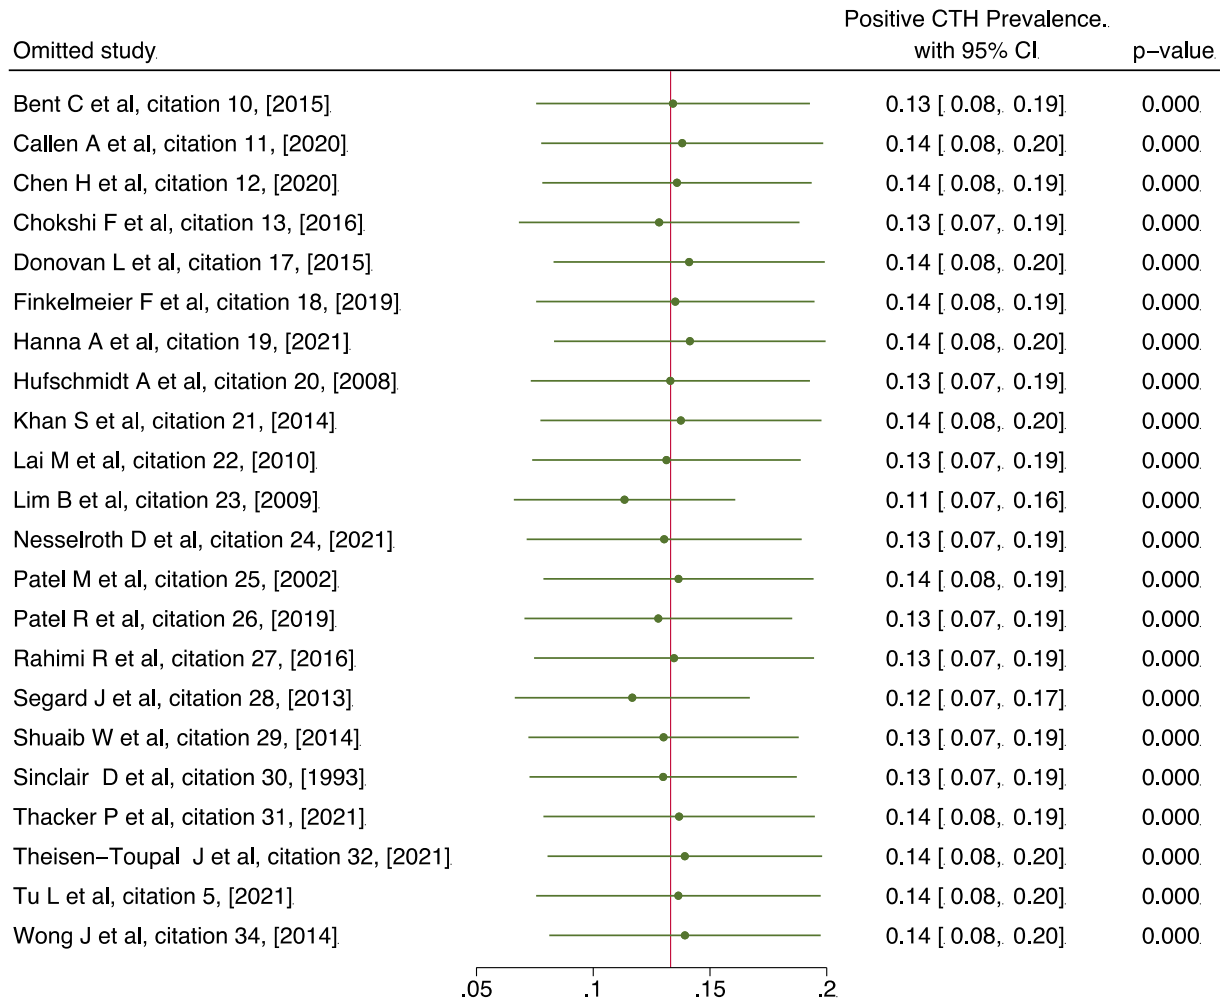

Random-effects REML model

**eFigure 4.** Sensitivity Analysis of Studies for Positive Computerized Tomography of Head (CTH) Events

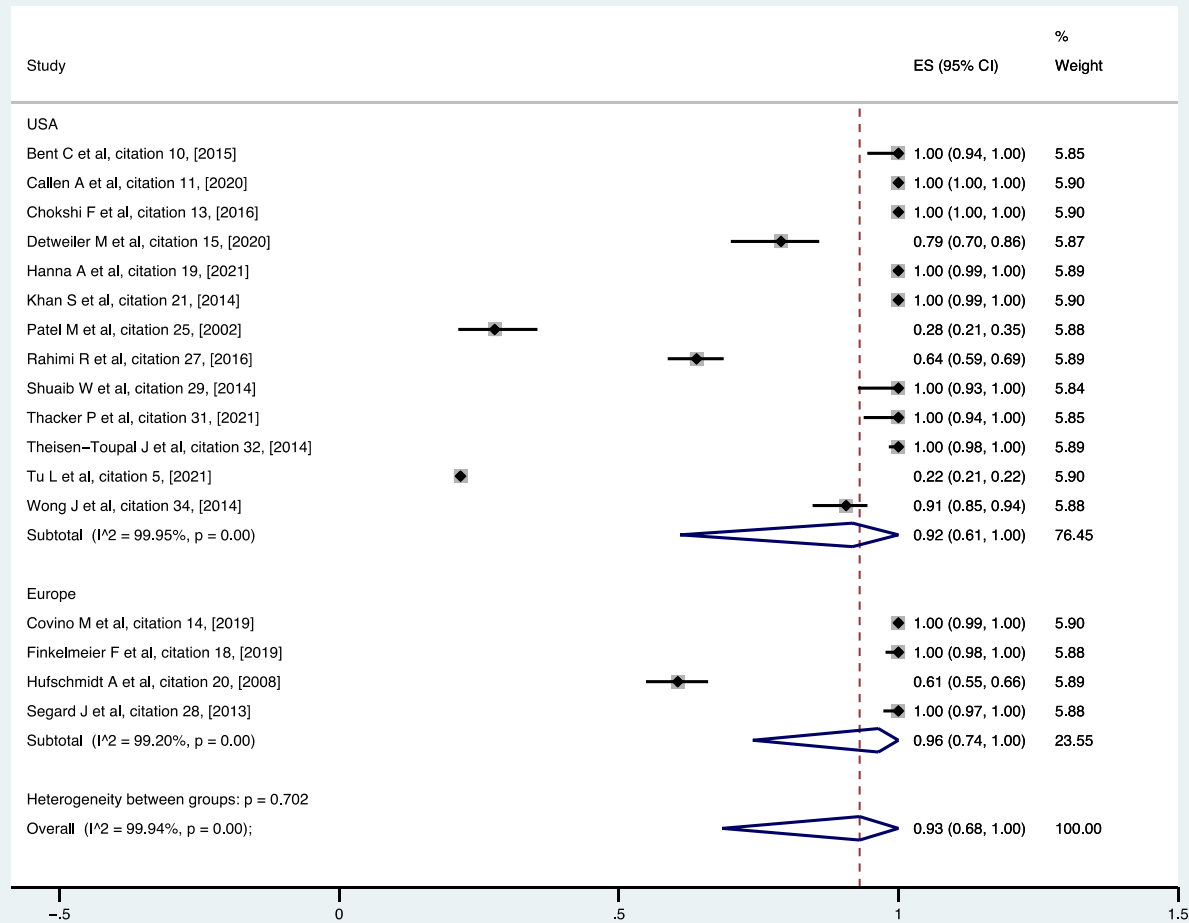

**eFigure 5.** The Proportion of Computerized Tomography of Head (CTH) in Patients With Altered Mental Status (AMS) Among Studies  
 ES= Effect size representing the proportion of CTH in AMS patients. The model used is the random effect model. USA= United States of America
